# Supplementary material for: Optimizing Color Performance of the Ngenuity 3-Dimensional Visualization System
Source: PubMed Central journal article supplement (PMC9559094; doi:10.1016/j.xops.2021.100054), 2021-08-24
Supplement: mmc1.pdf [file mmc1.pdf]

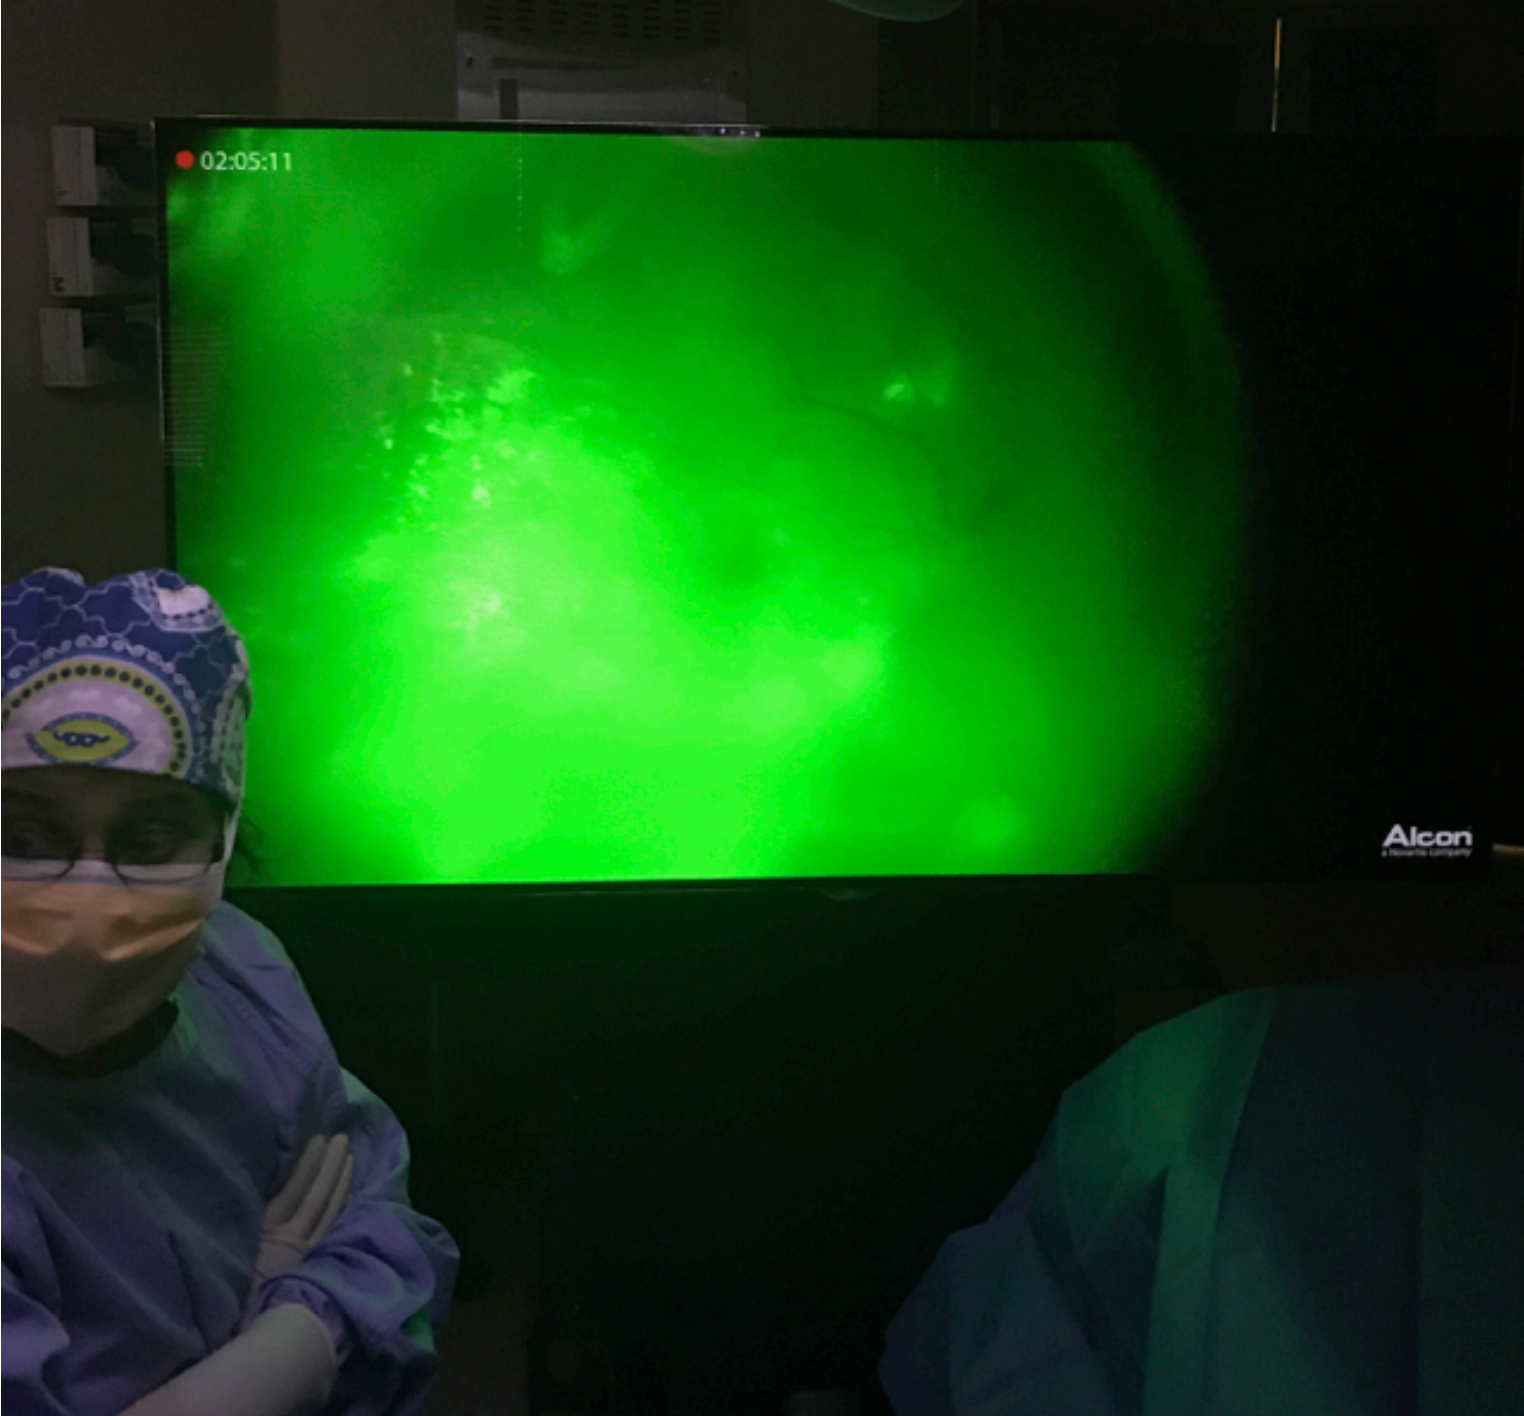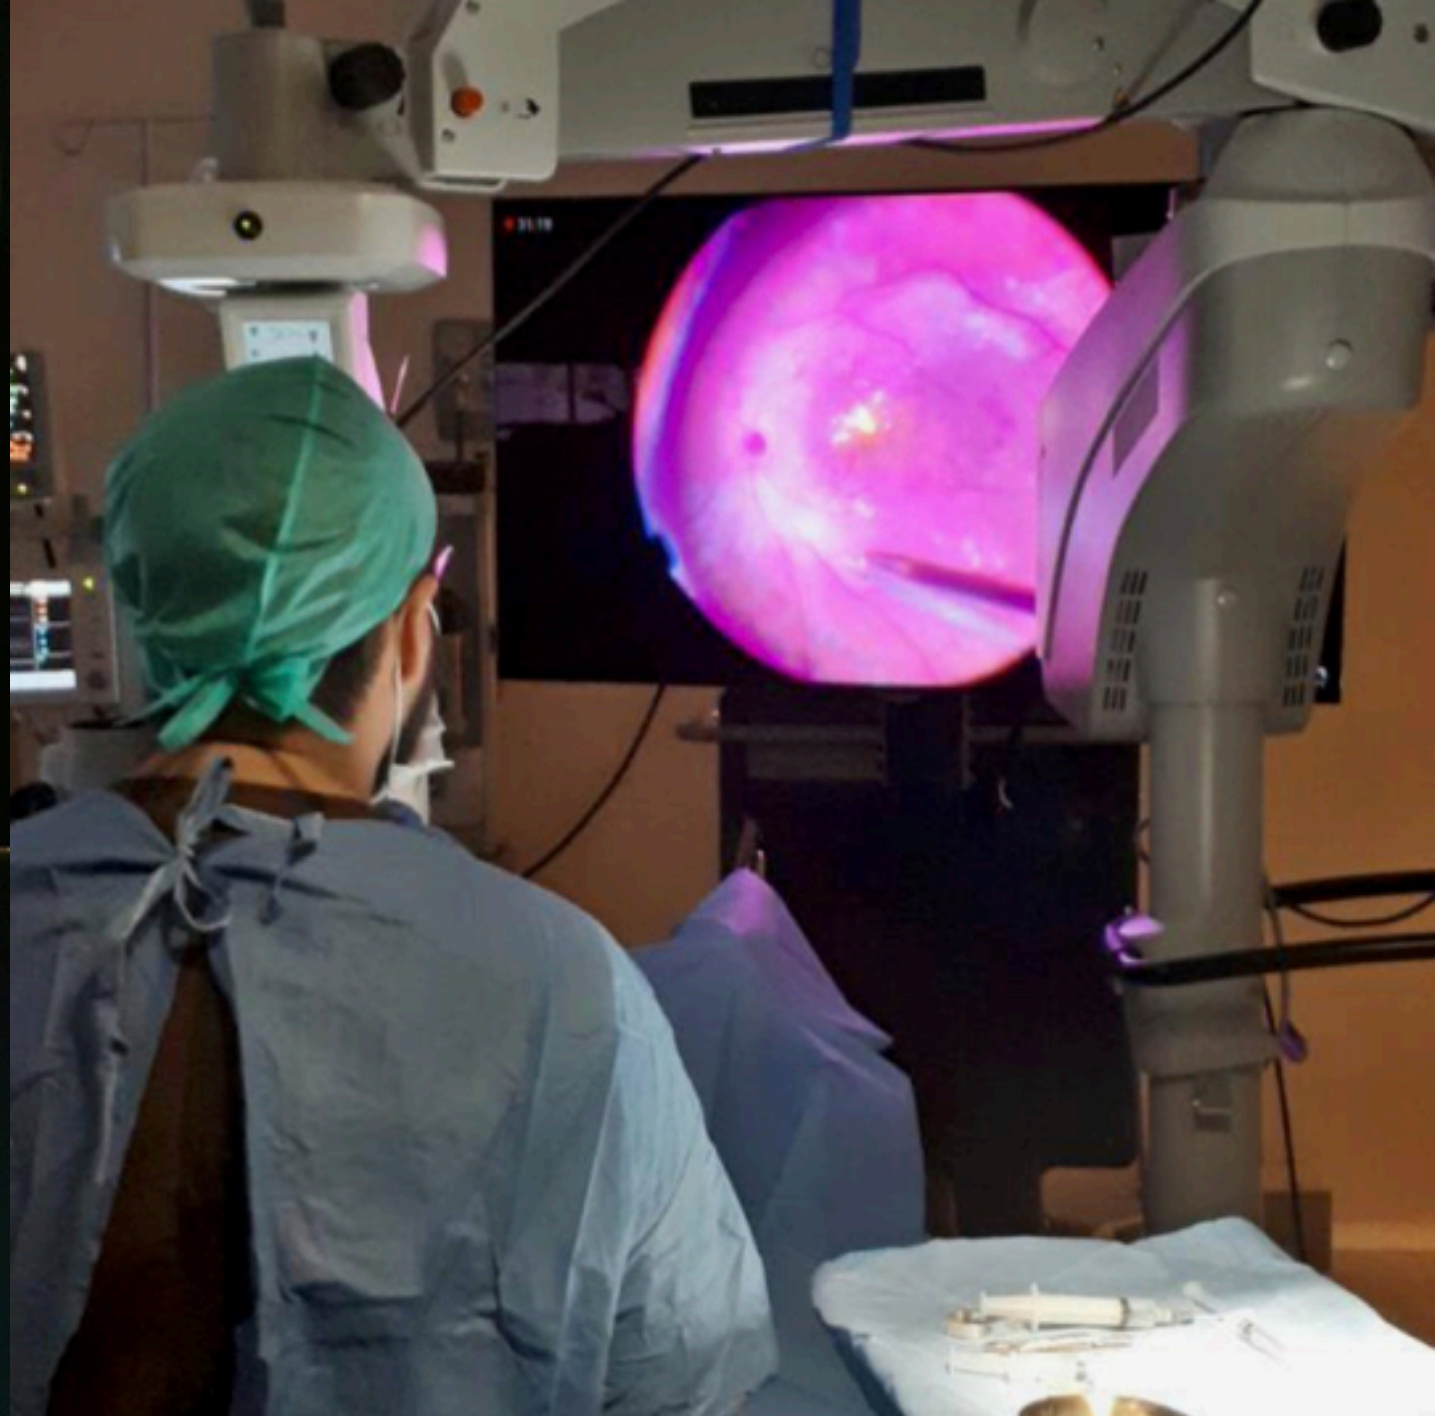

**Fig. S1.** Real-world examples of poor and variable color performance while using the Ngenuity<sup>®</sup> 3D Visualization System.
