# Supplementary material for: Optimizing Color Performance of the Ngenuity 3-Dimensional Visualization System
Source: PubMed Central journal article supplement (PMC9559094; doi:10.1016/j.xops.2021.100054), 2021-08-24
Supplement: mmc3.pdf [file mmc3.pdf]

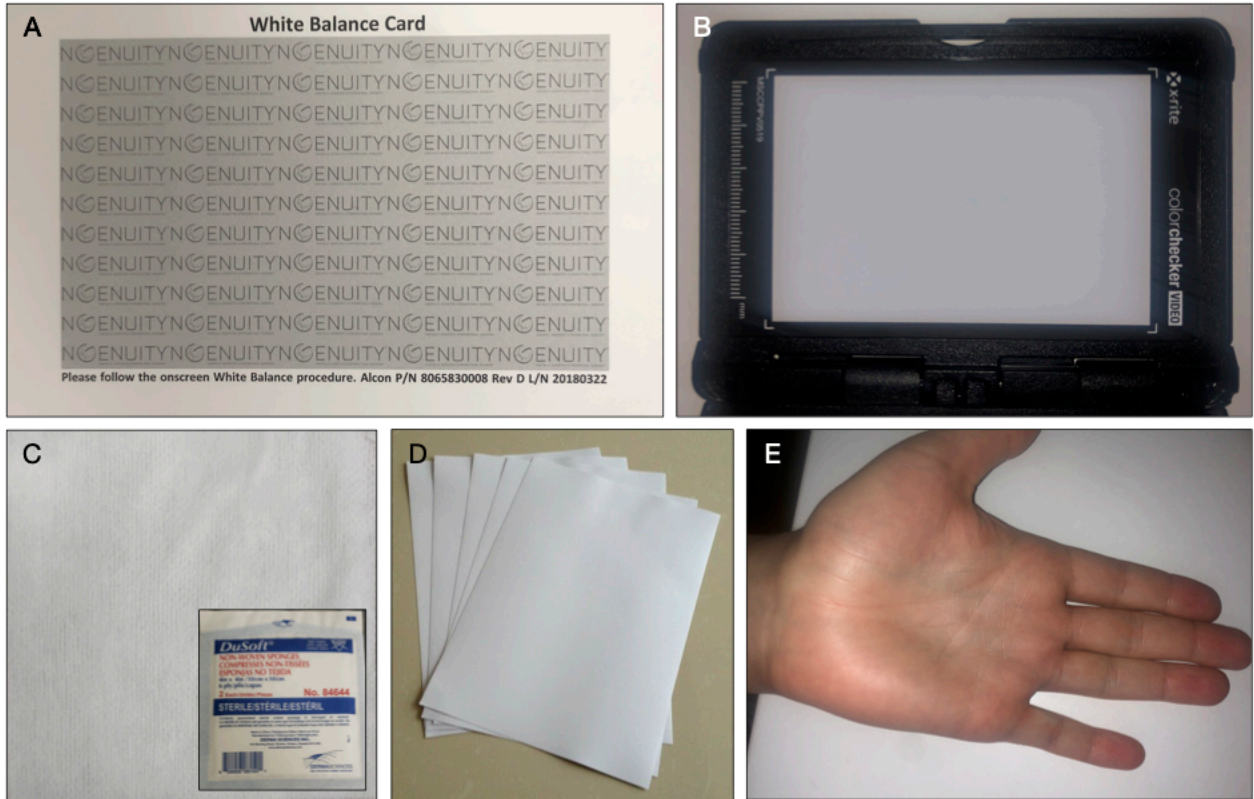

**Fig. S3.** White balance targets of (a) Ngenuity test card; (b) grey card; (c) 4x4 gauze; (d) standard white computer paper; and (e) the operator's palm.
